# Supplementary material for: Potential off-target effects of beta-blockers on gut hormone receptors: In silico study including GUT-DOCK—A web service for small-molecule docking
Source: PubMed Central journal article supplement (PMC6347188; doi:10.1371/journal.pone.0210705), 2019-01-25

Potential off-target effects of beta-blockers on gut hormone receptors: in silico study  
including GUT-DOCK – a web service for small-molecule docking

Pawel Paszник, Ewelina Rutkowska, Szymon Niewieczeral, Judyta Cielecka-Piontek,

Dorota Latek

## Supplementary material

**A file including: active compounds lists, sequence identity between templates and targets from the current study, figures presenting GUT-DOCK results for compound 15 and GLP1R.**

**Table A. Active compounds used for the enrichment computations.**

| Receptor | CHEMBL ID     | SMILES                                                                                                | Inhibitor constant<br>[micromolar] <sup>1</sup> |
|----------|---------------|-------------------------------------------------------------------------------------------------------|-------------------------------------------------|
| GCGR     | CHEMBL3673123 | <chem>C1=CC=C(C(=C1)CNC2=CC=C(C=C2)C3=CC=C(C=C3)Cl)C4=CC=C(C=C4)C(=O)NCCC(=O)O</chem>                 | 0.06                                            |
|          | CHEMBL1933354 | <chem>CCCC(C1=CC=C(C=C1)C(=O)NCCC(=O)O)OC2=CN(N=C2)C3=CC=CC(=C3)CC</chem>                             | 4.53                                            |
|          | CHEMBL1933348 | <chem>CCCC1=C(C(=C(C=C1C(C)C)C(C)C)C(C)O)C2=CC=C(C=C2)F</chem>                                        | 0.078                                           |
|          | CHEMBL1933361 | <chem>CCCC(C1=CC=C(C=C1)C(=O)NCCC(=O)O)OC2=CN(N=C2)C3=NC=C(C=C3)C(F)(F)F</chem>                       | 16.4                                            |
|          | CHEMBL3799802 | <chem>CC(C1=CC=C(C=C1)C(=O)NCCC(=O)O)N2C(=CC(=N2)C3=CC(=CC(=C3)Cl)Cl)C4=CC5=C(C=C4)C=C(C=C5)OC</chem> | 0.1                                             |
|          | CHEMBL486634  | <chem>C1CCC(=CC1)C2=CC=C(C=C2)N(CC3=CC=C(C=C3)C(=O)NCC(C(=O)O)O)C(=O)NC4=CC(=CC(=C4)Cl)Cl</chem>      | 0.014 <sup>2</sup>                              |
|          | CHEMBL1644183 | <chem>C1=CC(=CC=C1CN2C(=CC(=N2)C3=CC(=CC(=C3)Cl)Cl)C4=CC=C(C=C4)OC(F)(F)F)C(=O)NCCC(=O)O</chem>       | 0.044                                           |
|          | CHEMBL1644178 | <chem>CC(C)(C)C1CCC(CC1)C2=CC(=NN2CC3=CC=C(C=C3)C(=O)NC4=NNN=N4)C5=CC=C(C=C5)OC(F)(F)F</chem>         | 0.17                                            |
|          | CHEMBL1644180 | <chem>C1=CC(=CC=C1CN2C(=CC(=N2)C3=CC=C(C=C3)OC(F)(F)F)C4=CC=C(C=C4)OC(F)(F)F)C(=O)NC5=NNN=N5</chem>   | 0.047                                           |
|          | CHEMBL1933358 | <chem>CCCC(C1=CC=C(C=C1)C(=O)NCCC(=O)O)OC2=CN(N=C2)C3=CC(=CC=C3)OC</chem>                             | 19.1                                            |
| GIPR     | CHEMBL446821  | <chem>C1CC2=C(C1)C=C(C=C2)N(CC3=CC=C(C=C3)C(=O)NCCC(=O)O)C4=NC(=CS4)C5=CC=C(C=C5)OC(F)(F)F</chem>     |                                                 |
|          | CHEMBL501628  | <chem>C1=CC(=CC=C1CN(C2=CC=C(C=C2)OC(F)(F)F)C3=NC(=CS3)C4=CC=C(C=C4)C(F)(F)F)C(=O)NCCC(=O)O</chem>    |                                                 |
|          | CHEMBL62444   | <chem>CC(C)(C)C1CCC(CC1)N(CC2=CC=C(C=C2)C(=O)NCCC(=O)O)C(=O)NC3=CC=C(C=C3)OC(F)(F)F</chem>            |                                                 |
|          | CHEMBL232224  | <chem>CC(C)(C)C1CCC(CC1)N(C2CCC3=C2C=CC(=C3)C(=O)NCCC(=O)O)C(=O)CC4</chem>                            |                                                 |

|       |               |                                                                                                        |
|-------|---------------|--------------------------------------------------------------------------------------------------------|
|       |               | <chem>=CC=C(C=C4)OC(F)(F)F</chem>                                                                      |
|       | CHEMBL411832  | <chem>CC(C)(C)C1CCC(CC1)N(C2CCOC3=C2C=CC(=C3)C(=O)NC4=NNN=N4)C(=O)NC5=CC=C(C=C5)OC(F)(F)F</chem>       |
|       | CHEMBL452067  | <chem>CC1=CC(=CC(=C1)NC(=O)N(CC2=CC=C(C=C2)C(=O)NCC(C(=O)O)O)C3CCC(CC3)C(C)(C)C)C</chem>               |
|       | CHEMBL452311  | <chem>C1CCC(CC1)C2=CC=C(C=C2)N(CC3=CC=C(C=C3)C(=O)NCC(C(=O)O)O)C(=O)NC4=CC(=CC=C4)Br</chem>            |
|       | CHEMBL456738  | <chem>COC1=CC(=CC(=C1)NC(=O)N(CC2=CC=C(C=C2)C(=O)NCC(C(=O)O)O)C3=C(C=C3)C4CCCC4)C(F)(F)F</chem>        |
|       | CHEMBL453457  | <chem>C1CCC(CC1)C2=CC=C(C=C2)N(CC3=CC=C(C=C3)C(=O)NCC(C(=O)O)O)C(=O)NC4=CC=C(C=C4)SC(F)(F)F</chem>     |
|       | CHEMBL1922839 | <chem>CCCOC1=CC(=CC2=C1N(C(=NC3=CC=C(C=C3)C(C)(C)C)N2CC4=CC=C(C=C4)C(=O)NC5=NNN=N5)C)C(F)(F)F</chem>   |
| GLPR1 | CHEMBL198736  | <chem>CC(C)(C)C1CCC(CC1)N(CC2=CC=C(C=C2)C(=O)NCCC(=O)O)C(=O)NC3=CC=C(C=C3)OC(F)(F)F</chem>             |
|       | CHEMBL219384  | <chem>CC(C)(C)C1=CC=C(C=C1)N(CC2=CC=C(C=C2)C(=O)NCCC(=O)O)C(=O)NC3=CC=C(C=C3)OC(F)(F)F</chem>          |
|       | CHEMBL386446  | <chem>C1CCC(=CC1)C2=CC=C(C=C2)N(CC3=CC=C(C=C3)C(=O)NCCC(=O)O)C(=O)NC4=CC(=CC(=C4)Cl)Cl</chem>          |
|       | CHEMBL487476  | <chem>C1CCC(=CC1)C2=CC=C(C=C2)N(CC3=CC=C(C=C3)C(=O)NCC(C(=O)O)O)C(=O)NC4=CC(=CC(=C4)Cl)Cl</chem>       |
|       | CHEMBL519903  | <chem>C1CCC(=CC1)C2=CC=C(C=C2)N(CC3=CC=C(C=C3)C(=O)NCC(C(=O)O)O)C(=O)NC4=CC(=CC(=C4)Cl)Cl</chem>       |
|       | CHEMBL499160  | <chem>CC(C)(C)C1CCC(CC1)N(CC2=CC=C(C=C2)C(=O)NCC(C(=O)O)O)C(=O)NC3=CC(=CC(=C3)C(F)(F)F)C(F)(F)F</chem> |
|       | CHEMBL452310  | <chem>COC(CNC(=O)C1=CC=C(C=C1)CN(C2=CC=C(C=C2)C3=CCCC3)C(=O)NC4=CC(=CC(=C4)Cl)Cl)C(=O)O</chem>         |
|       | CHEMBL1933365 | <chem>C1CCC(C1)C(C2=CC=C(C=C2)C(=O)NCCC(=O)O)NC3=CN(N=C3)C4=CC=C(C=C4)C(F)(F)F</chem>                  |
|       | CHEMBL1933360 | <chem>CCCC(C1=CC=C(C=C1)C(=O)NCCC(=O)O)OC2=CN(N=C2)C3=CC=C(C=C3)C(F)(F)F</chem>                        |
|       | CHEMBL198736  | <chem>CC(C)(C)C1CCC(CC1)N(CC2=CC=C(C=C2)C(=O)NCCC(=O)O)C(=O)NC3=CC=C(C=C3)OC(F)(F)F</chem>             |

<sup>1</sup> Values were extracted from the Pubchem database.

<sup>2</sup> Here, the IC50 value was deposited in the Pubchem database.

**Table B. Clustal Omega identity scores computed between target and template sequences used in this study.**

| Target – Uniprot entry | Template – Uniprot entry | Sequence identity score<br>[%] |
|------------------------|--------------------------|--------------------------------|
| GLR_HUMAN - P47871     | GLP1R_HUMAN - P43220     | 47.23                          |
|                        | GIPR_HUMAN - P48546      | 50.44                          |
|                        | VIPR1_HUMAN - P32241     | 36.22                          |
|                        | PACR_HUMAN - P41586      | 35.68                          |

|                      |                      |       |
|----------------------|----------------------|-------|
| GLP1R_HUMAN - P43220 | GIPR_HUMAN - P48546  | 45.82 |
|                      | VIPR1_HUMAN - P32241 | 39.12 |
|                      | PACR_HUMAN - P41586  | 33.89 |
| GIPR_HUMAN - P48546  | VIPR1_HUMAN - P32241 | 37.13 |
|                      | PACR_HUMAN - P41586  | 34.43 |
| VIPR1_HUMAN - P32241 | PACR_HUMAN - P41586  | 49.54 |

**Figure A. GUT-DOCK results for compound 15 – Autodock VINA-generated binding affinities for GLP1R.** Here, the binding affinity of compound 15 was compared with precomputed binding affinities of other beta-blockers (see Table 3 in the main text of the manuscript) for GLP1R. Compound 15 was docked to the allosteric binding site of GLP1R.

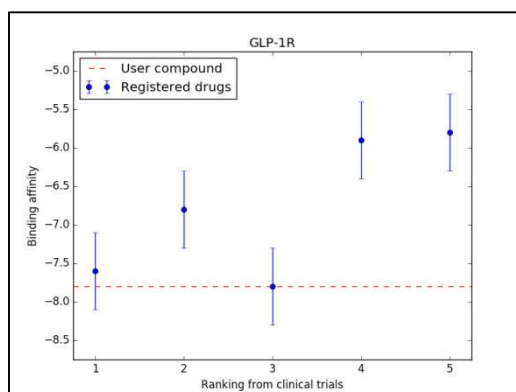

**Figure B. GUT-DOCK results for compound 15 – a Ligplot-generated visualization of interactions with GLP1R.** Here, standard Ligplot settings for hydrogen bonds were used. Compound 15 was docked to the allosteric binding site of GLP1R.

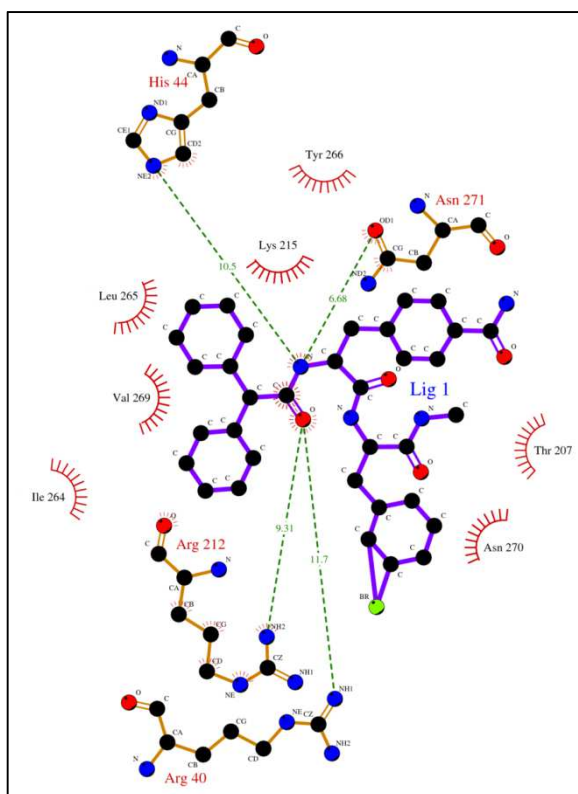

**Figure C. The binding mode of compound 15 to GLP1R obtained with GUT-DOCK.** Here, GLP1R was used as a GPCR receptor, left – extracellular view of the orthosteric site, right – side view of the allosteric site. Class B GPCR conserved residues were depicted. Compound 15 located in the orthosteric site (the Autodock VINA score equal to -10.5) formed hydrogen bonds (yellow dashed lines) with Q3.37 and R5.40. Compound 15 located in the allosteric site (the Autodock VINA score equal to -7.8) formed hydrogen bonds with R6.37, N8.51 and R2.55 and polar contact with S6.41.

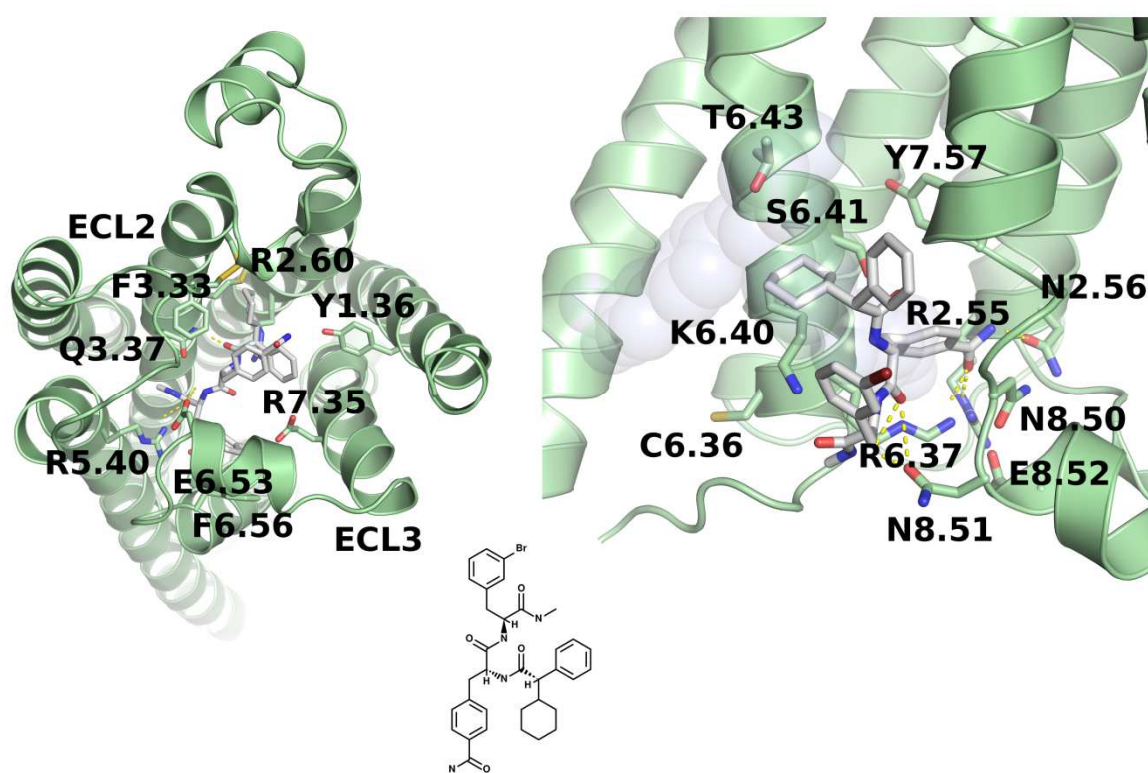

Supplement: pone.0210705.s001.pdf [file pone.0210705.s001.pdf]
